# Supplementary material for: Dynamic landscape of the intracellular termini of acid-sensing ion channel 1a
Source: eLife. 2023 Dec 6;12:RP90755. doi: 10.7554/eLife.90755 (PMC10699805; doi:10.7554/eLife.90755)
Supplement: Figure 2—source data 1. — Significance was determined using 1-way ANOVA with a Dunnet’s post-hoc test for multiple comparisons to a single control. [file elife-90755-fig2-data1.xlsx]

## Sheet: Figure 2- source data 1
				Source Data
				Figure 2C
			C469 WT		cell 1	cell 2	cell 3	cell 4	cell 5	pH50	6.52
				pH0.5	6.50484	6.42821	6.5191	6.56908	6.57857	SEM	0.03	P Value	n/a
										n	5
			E8TAG		cell 1	cell 2	cell 3			pH50	6.65
				pH0.5	6.59861	6.66693	6.69066			SEM	0.02	P Value	0.04
										n	3
			G11TAG		cell 1	cell 2	cell 3	cell 4		pH50	6.59
				pH0.5	6.62255	6.49097	6.65133	6.58439		SEM	0.03	P Value	0.36
										n	4
			Q14TAG		cell 1	cell 2	cell 3	cell 4	cell 5	pH50	6.39
				pH0.5	6.39063	6.37901	6.41766	6.4222	6.33703	SEM	0.02	P Value	0.02
										n	5
			505TAG		cell 1	cell 2	cell 3	cell 4		pH50	6.58
				pH0.5	6.48516	6.68904	6.61481	6.52598		SEM	0.05	P Value	0.48
										n	4
