# Supplementary material for: Dynamic landscape of the intracellular termini of acid-sensing ion channel 1a
Source: eLife. 2023 Dec 6;12:RP90755. doi: 10.7554/eLife.90755 (PMC10699805; doi:10.7554/eLife.90755)
Supplement: Figure 6—source data 1. — P values were calculated using a two-way ANOVA with Tukey’s multiple comparisons test. [file elife-90755-fig6-data1.xlsx]

## Sheet: Figure 6- source data 1
	TAG position comparison	P value
pH 8 vs pH 6	E8TAG pH 8 vs. E8TAG pH 6	0.1068
	G11TAG pH 8 vs. G11TAG pH 6	0.0091
	Q14TAG pH 8 vs. Q14TAG pH 6	<0.0001
	S24TAG pH 8 vs. S24TAG pH 6	0.0069
	I33TAG pH 8 vs. I33TAG pH 6	<0.0001
	A44TAG pH 8 vs. A44TAG pH 6	<0.0001
pH 8 vs pH 8	E8TAG pH 8 vs. G11TAG pH 8	0.9991
	E8TAG pH 8 vs. Q14TAG pH 8	0.0139
	G11TAG pH 8 vs. Q14TAG pH 8	0.0071
	S24TAG pH 8 vs. I33TAG pH 8	0.0521
	S24TAG pH 8 vs. A44TAG pH 8	0.9973
	I33TAG pH 8 vs. A44TAG pH 8	0.4091
pH 6 vs pH 6	E8TAG pH 6 vs. G11TAG pH 6	0.7078
	E8TAG pH 6 vs. Q14TAG pH 6	<0.0001
	G11TAG pH 6 vs. Q14TAG pH 6	0.0818
	S24TAG pH 6 vs. I33TAG pH 6	0.9865
	S24TAG pH 6 vs. A44TAG pH 6	<0.0001
	I33TAG pH 6 vs. A44TAG pH 6	<0.0001

## Sheet: Figure 6- source data 2
	TAG position comparison	P value
pH 8 vs pH 6	G11TAG pH 8 vs. G11TAG pH 6	0.0381
	Q14TAG pH 8 vs. Q14TAG pH 6	0.9759
	S24TAG pH 8 vs. S24TAG pH 6	0.0075
pH 8 vs pH 8	G11TAG pH 8 vs. Q14TAG pH 8	0.9732
	G11TAG pH 8 vs. S24TAG pH 8	0.0259
	Q14TAG pH 8 vs. S24TAG pH 8	0.4234
pH 6 vs pH 6	G11TAG pH 6 vs. Q14TAG pH 6	0.6374
	G11TAG pH 6 vs. S24TAG pH 6	0.2881
	Q14TAG pH 6 vs. S24TAG pH 6	0.0015
