# Supplementary material for: Dynamic landscape of the intracellular termini of acid-sensing ion channel 1a
Source: eLife. 2023 Dec 6;12:RP90755. doi: 10.7554/eLife.90755 (PMC10699805; doi:10.7554/eLife.90755)
Supplement: Figure 7—source data 1. — P values were calculated using a two-way ANOVA with Tukey’s multiple comparisons test. [file elife-90755-fig7-data1.xlsx]

## Sheet: Figure 7-source data 1
	TAG position comparison	P value
pH 8 vs pH 6	E8 TAG pH 8 vs. E8 TAG pH 6	0.0065
	G11 TAG pH 8 vs. G11 TAG pH 6	<0.0001
	Q14 TAG pH 8 vs. Q14 TAG pH 6	<0.0001
	S24 TAG pH 8 vs. S24 TAG pH 6	<0.0001
pH 8 vs pH 8	E8 TAG pH 8 vs. G11 TAG pH 8	0.0005
	E8 TAG pH 8 vs. Q14 TAG pH 8	0.0323
	E8 TAG pH 8 vs. S24 TAG pH 8	<0.0001
	G11 TAG pH 8 vs. Q14 TAG pH 8	0.6303
	G11 TAG pH 8 vs. S24 TAG pH 8	0.9871
	Q14 TAG pH 8 vs. S24 TAG pH 8	0.0833
pH 6 vs pH 6	E8 TAG pH 6 vs. G11 TAG pH 6	<0.0001
	E8 TAG pH 6 vs. Q14 TAG pH 6	<0.0001
	E8 TAG pH 6 vs. S24 TAG pH 6	<0.0001
	G11 TAG pH 6 vs. Q14 TAG pH 6	>0.9999

## Sheet: Figure 7- source data 2
	TAG position comparison	P value
pH 8 vs pH 6	E8 TAG pH 8 vs. E8 TAG pH 6	0.0019
	Q14 TAG pH 8 vs. Q14 TAG pH 6	0.8454
pH 8 vs pH 8	E8 TAG pH 8 vs. Q14 TAG pH 8	0.0008
pH 6 vs pH 6	E8 TAG pH 6 vs. Q14 TAG pH 6	0.0944

## Sheet: Figure 7- source data 3
	TAG position comparison	P value
pH 8 vs pH 6	E8TAG pH 8 vs. E8TAG pH 6	<0.0001
	Q14TAG pH 8 vs. Q14TAG pH 6	<0.0001
pH 8 vs pH 8	E8TAG pH 8 vs. Q14TAG pH 8	<0.0001
pH 6 vs pH 6	E8TAG pH 6 vs. Q14TAG pH 6	<0.0001
