# Supplementary material for: Dynamic landscape of the intracellular termini of acid-sensing ion channel 1a
Source: eLife. 2023 Dec 6;12:RP90755. doi: 10.7554/eLife.90755 (PMC10699805; doi:10.7554/eLife.90755)
Supplement: Figure 8—source data 1. — p Values were calculated using a two-way ANOVA with Tukey’s multiple comparisons test. [file elife-90755-fig8-data1.xlsx]

## Sheet: Figure 8- source data 1
	TAG position comparison	P value
pH 8 vs pH 6	E8TAG pH 8 vs. E8TAG pH 6	0.9998
	G11TAG pH 8 vs. G11TAG pH 6	0.9975
	Q14TAG pH 8 vs. Q14TAG pH 6	0.0032
	S24TAG pH 8 vs. S24TAG pH 6	>0.9999
	I33TAG pH 8 vs. I33TAG pH 6	0.0001
pH 8 vs pH 8	E8TAG pH 8 vs. G11TAG pH 8	0.9949
	E8TAG pH 8 vs. Q14TAG pH 8	>0.9999
	G11TAG pH 8 vs. Q14TAG pH 8	>0.9999
	S24TAG pH 8 vs. I33TAG pH 8	0.0092
pH 6 vs pH 6	E8TAG pH 6 vs. G11TAG pH 6	0.155
	E8TAG pH 6 vs. Q14TAG pH 6	<0.0001
	G11TAG pH 6 vs. Q14TAG pH 6	0.0576
	S24TAG pH 6 vs. I33TAG pH 6	>0.9999

## Sheet: Figure 8- source data 2
	TAG position comparison	P value
pH 8 vs pH 6	464TAG pH 8 vs. 464TAG pH 6	0.8153
	505TAG pH 8 vs. 505TAG pH 6	<0.0001
pH 8 vs pH 8	464TAG pH 8 vs. 505TAG pH 8	0.8693
pH 6 vs pH 6	464TAG pH 6 vs. 505TAG pH 6	0.0366
